# Supplementary material for: Impact of Chemotherapy Delay on Overall Survival for AML with IDH1/2 Mutations: A Study in Adult Chinese Patients
Source: PubMed Central journal article supplement (PMC4605653; doi:10.1371/journal.pone.0140622), 2015-10-14

**A**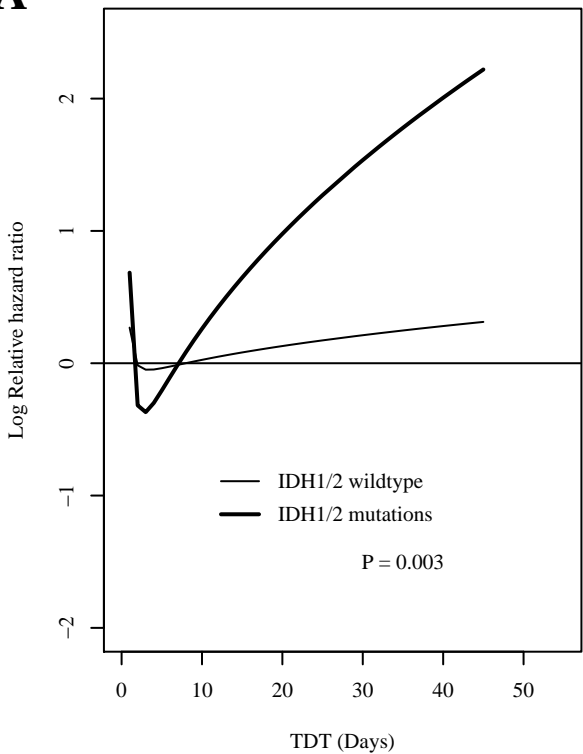**B**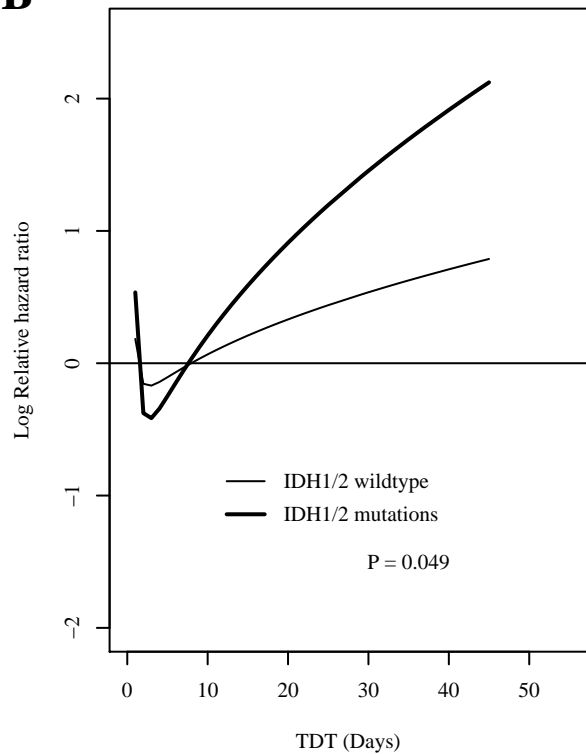**C**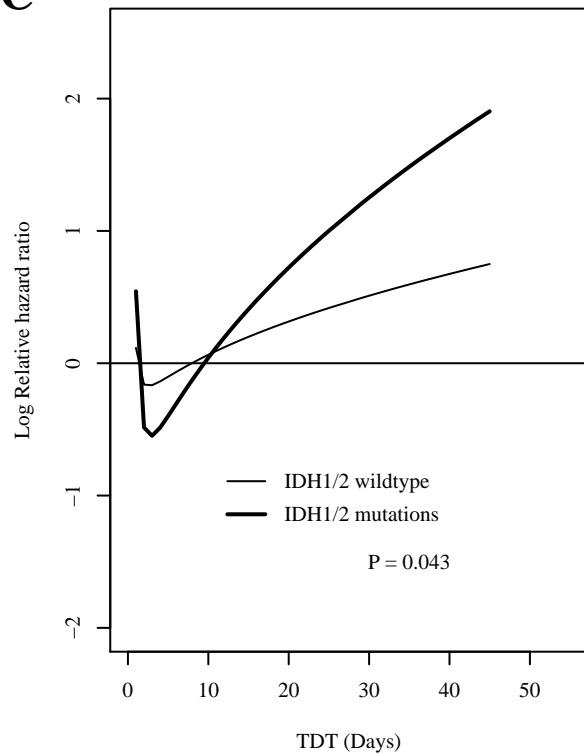

Supplement: pone.0140622.s002.pdf [file pone.0140622.s002.pdf]
